# Supplementary material for: Pilot-Scale Fermentation of Pseudoalteromonas sp. Strain FDHY-MZ2: An Effective Strategy for Increasing Algicidal Activity
Source: MDPI journal article supplement (doi:10.3390/biology12111447), 2023-11-17
Supplement: s1 [file s1]

**Table S1.** L<sub>9</sub> (4<sup>3</sup>) Orthogonal design of FDHY-MZ2 shake flask optimization

| Experiment no. | Carbon<br>sources(A,%) | Nitrogen<br>sources(B,%) | pH(C)  | Time(D,h) |
|----------------|------------------------|--------------------------|--------|-----------|
| 1              | 1(0.5)                 | 1(0.5)                   | 1(7.5) | 1(24)     |
| 2              | 1(0.5)                 | 2(1.0)                   | 2(8.0) | 2(36)     |
| 3              | 1(0.5)                 | 3(1.5)                   | 3(8.5) | 3(48)     |
| 4              | 2(1.0)                 | 1(0.5)                   | 2(8.0) | 3(48)     |
| 5              | 2(1.0)                 | 2(1.0)                   | 3(8.5) | 1(24)     |
| 6              | 2(1.0)                 | 3(1.5)                   | 1(7.5) | 2(36)     |
| 7              | 3(1.5)                 | 1(0.5)                   | 3(8.5) | 2(36)     |
| 8              | 3(1.5)                 | 2(1.0)                   | 1(7.5) | 3(48)     |
| 9              | 3(1.5)                 | 3(1.5)                   | 2(8.0) | 1(24)     |

**Table S2.** Optimized conditions for different fermenter sizes and results after 66 hours of fermentation

| Fermenter<br>size | Optimition conditions |                       |                    |                                          |                                                   | Results(afer 66 h fermentation) |            |                                                                       |
|-------------------|-----------------------|-----------------------|--------------------|------------------------------------------|---------------------------------------------------|---------------------------------|------------|-----------------------------------------------------------------------|
|                   | Rotational<br>speeds  | Ventilation<br>volume | Inoculums<br>level | Feeding<br>strategy                      | pH                                                | OD <sub>600</sub>               | Dry weight | Bacteria-algae<br>ratio(achieve<br>100%<br>algicidal rate<br>in 24 h) |
| 5 L               | 300 rpm               | 2 L/min               | 5 %                | Feeding<br>full culture<br>medium        | Initial pH<br>7.5 and no<br>subsequent<br>control | 10.21                           | 12.28 g/L  | 0.05%(v/v)                                                            |
| 50 L              | 450 rpm               | 30 L/min              | 3 %                | Constant<br>feeding<br>soluble<br>starch | Initial pH<br>7.5 and no<br>subsequent<br>control | 35.05                           | 27.70 g/L  | 0.025%(v/v)                                                           |

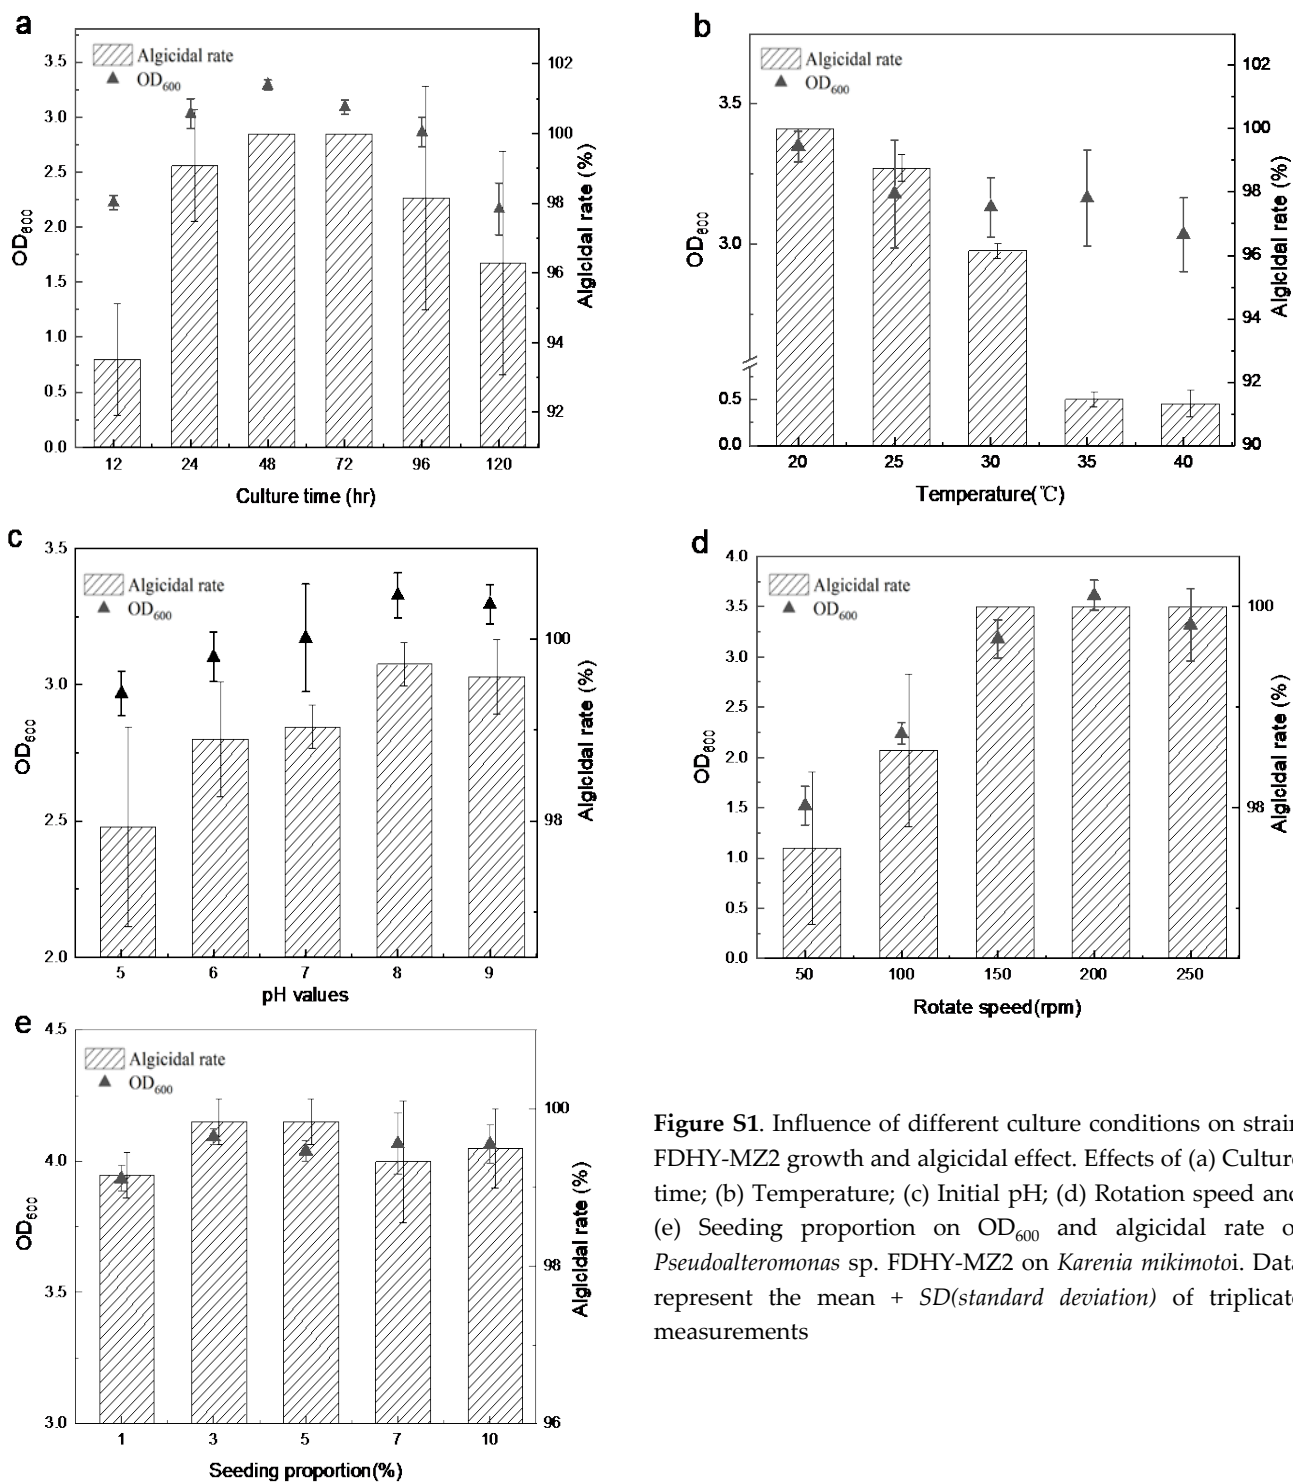

**Figure S1.** Influence of different culture conditions on strain FDHY-MZ2 growth and algicidal effect. Effects of (a) Culture time; (b) Temperature; (c) Initial pH; (d) Rotation speed and (e) Seeding proportion on OD<sub>600</sub> and algicidal rate of *Pseudoalteromonas* sp. FDHY-MZ2 on *Karenia mikimotoi*. Data represent the mean + SD (standard deviation) of triplicate measurements

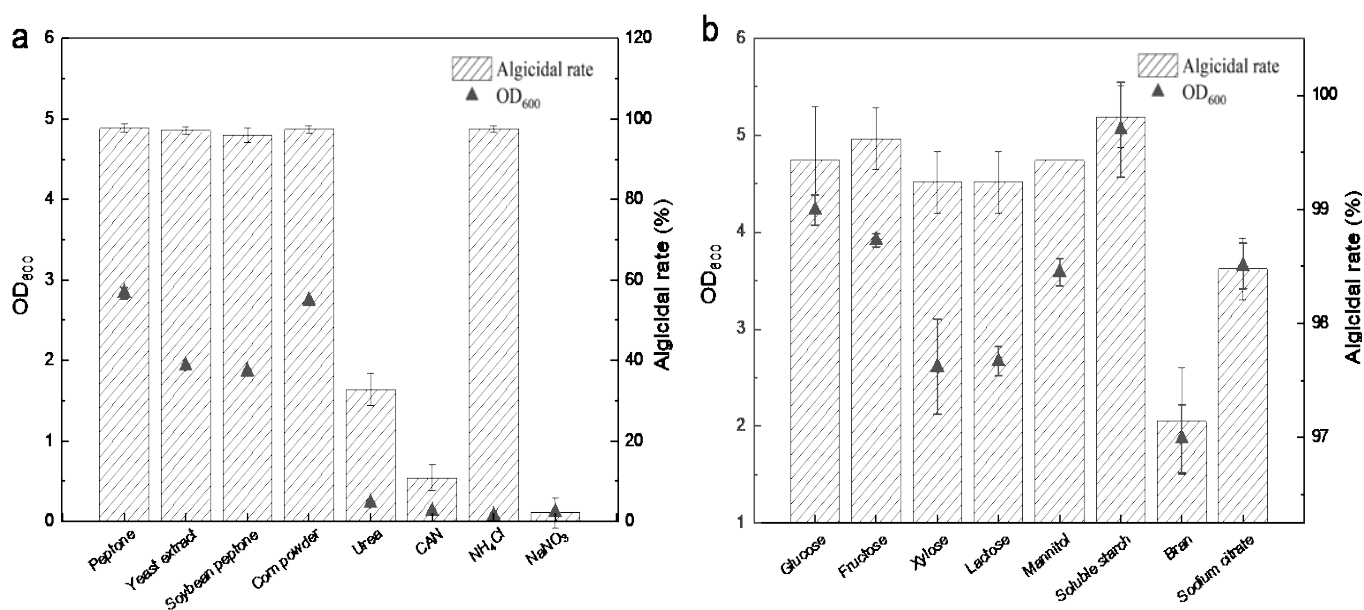

**Figure S2.** Influence of different medium components on strain FDHY-MZ2 growth and algicidal effect. Effects of (a)Carbon sources, (b)Nitrogen sources on OD<sub>600</sub> and algicidal rate of *Pseudoalteromonas* sp. FDHY-MZ2. Data represent the mean + SD(standard deviation) of triplicate measurements

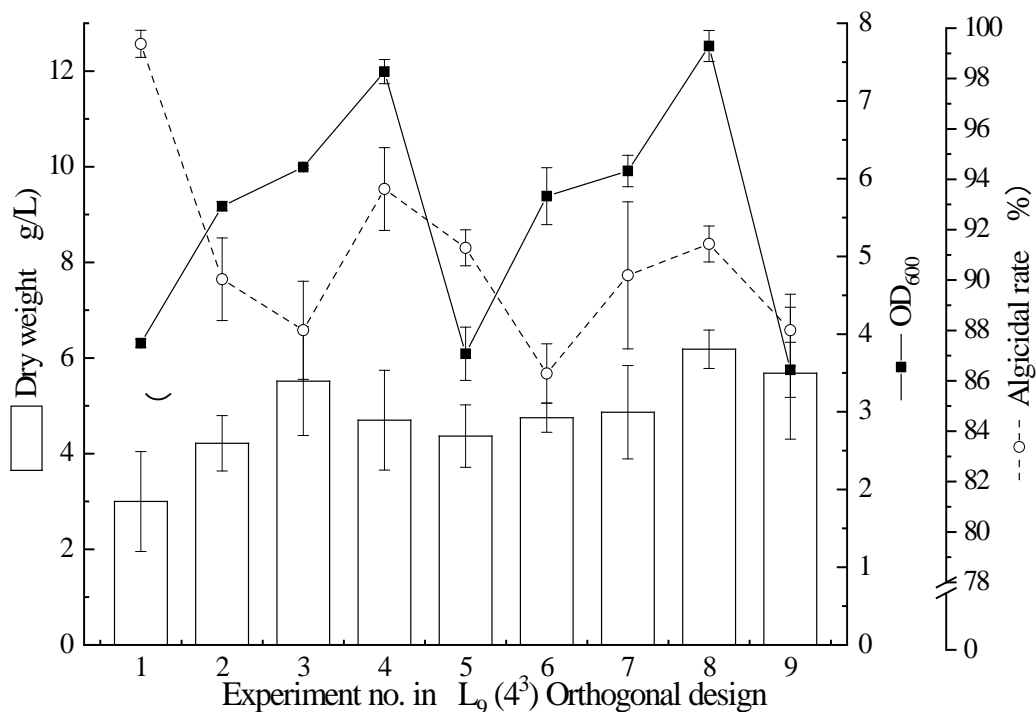

**Figure S3.** Results of OD<sub>600</sub> and dry weight of strain FDHY-MZ2 with 2216E medium and optimized cultivate (medium and conditions). Data represent the mean + SD(standard deviation) of triplicate

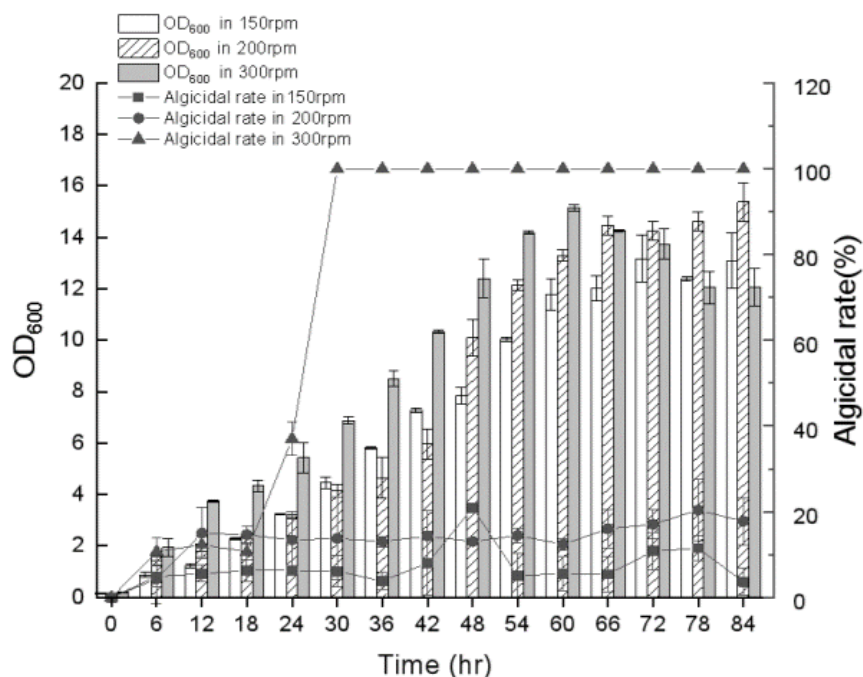

**Figure S4.** Changes of fermentation indexes: OD<sub>600</sub> and algidal rate of FDHY-MZ2 on *Karenia mikimotoi* at different rotating speeds(150 rpm,200 rpm,300 rpm) in 5 L fermenter. Data represent the mean + SD(standard deviation) of triplicate measurements (n=3)

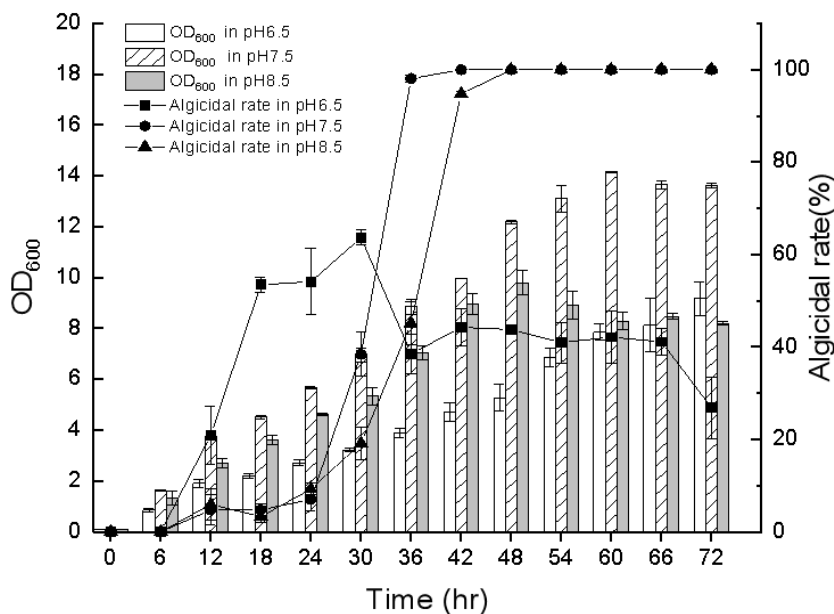

**Figure S5.** Changes of fermentation indexes: OD<sub>600</sub> and algidal rate of FDHY-MZ2 on *Karenia mikimotoi* at different constant pH(pH6.5,pH7.5,pH8.5) in 5 L fermenter. Data represent the mean + SD(standard deviation) of triplicate measurements (n=3)

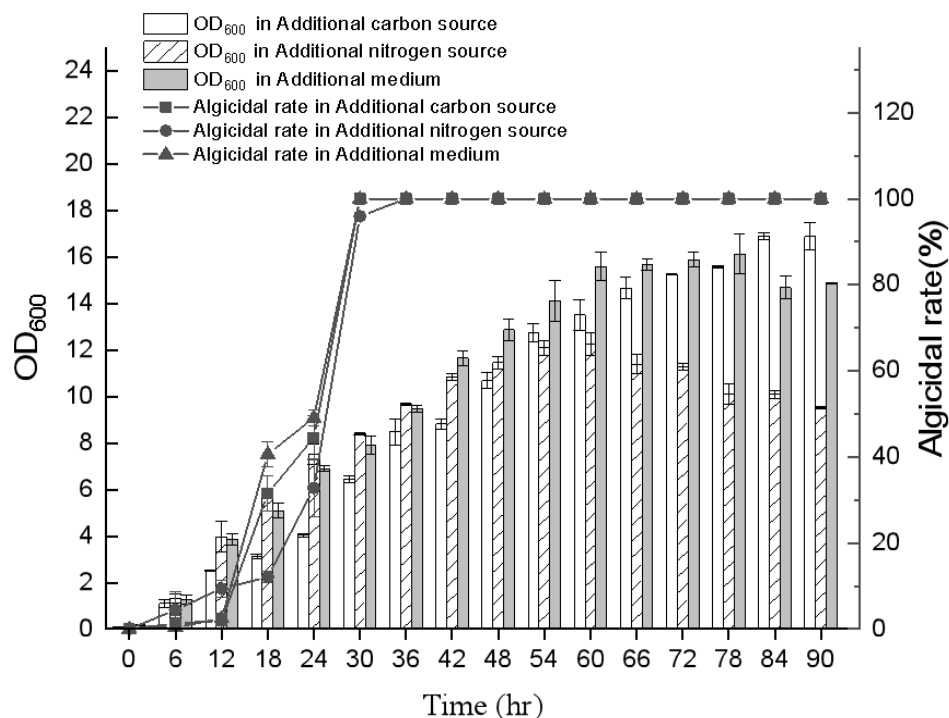

**Figure S6.** Changes of fermentation indexes: OD<sub>600</sub> and algicidal rate of FDHY-MZ2 on *Karenia mikimotoi* with different feeding strategies in 5 L fermenter. Data represent the mean + SD (standard deviation) of triplicate measurements

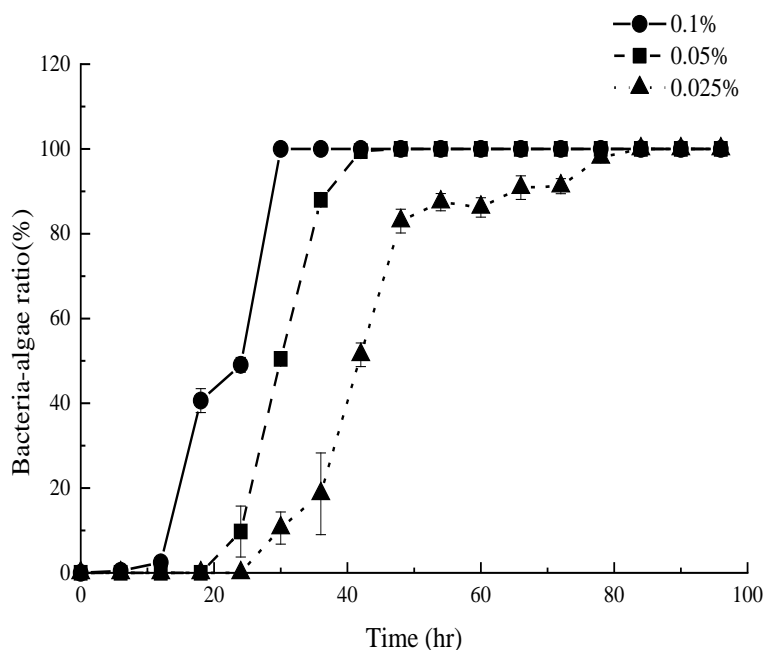

**Figure S7.** Algae dissolution experiment with different volume ratios of bacteria and algae after optimization of feeding strategy. Data represent the mean + SD (standard deviation) of triplicate measurements

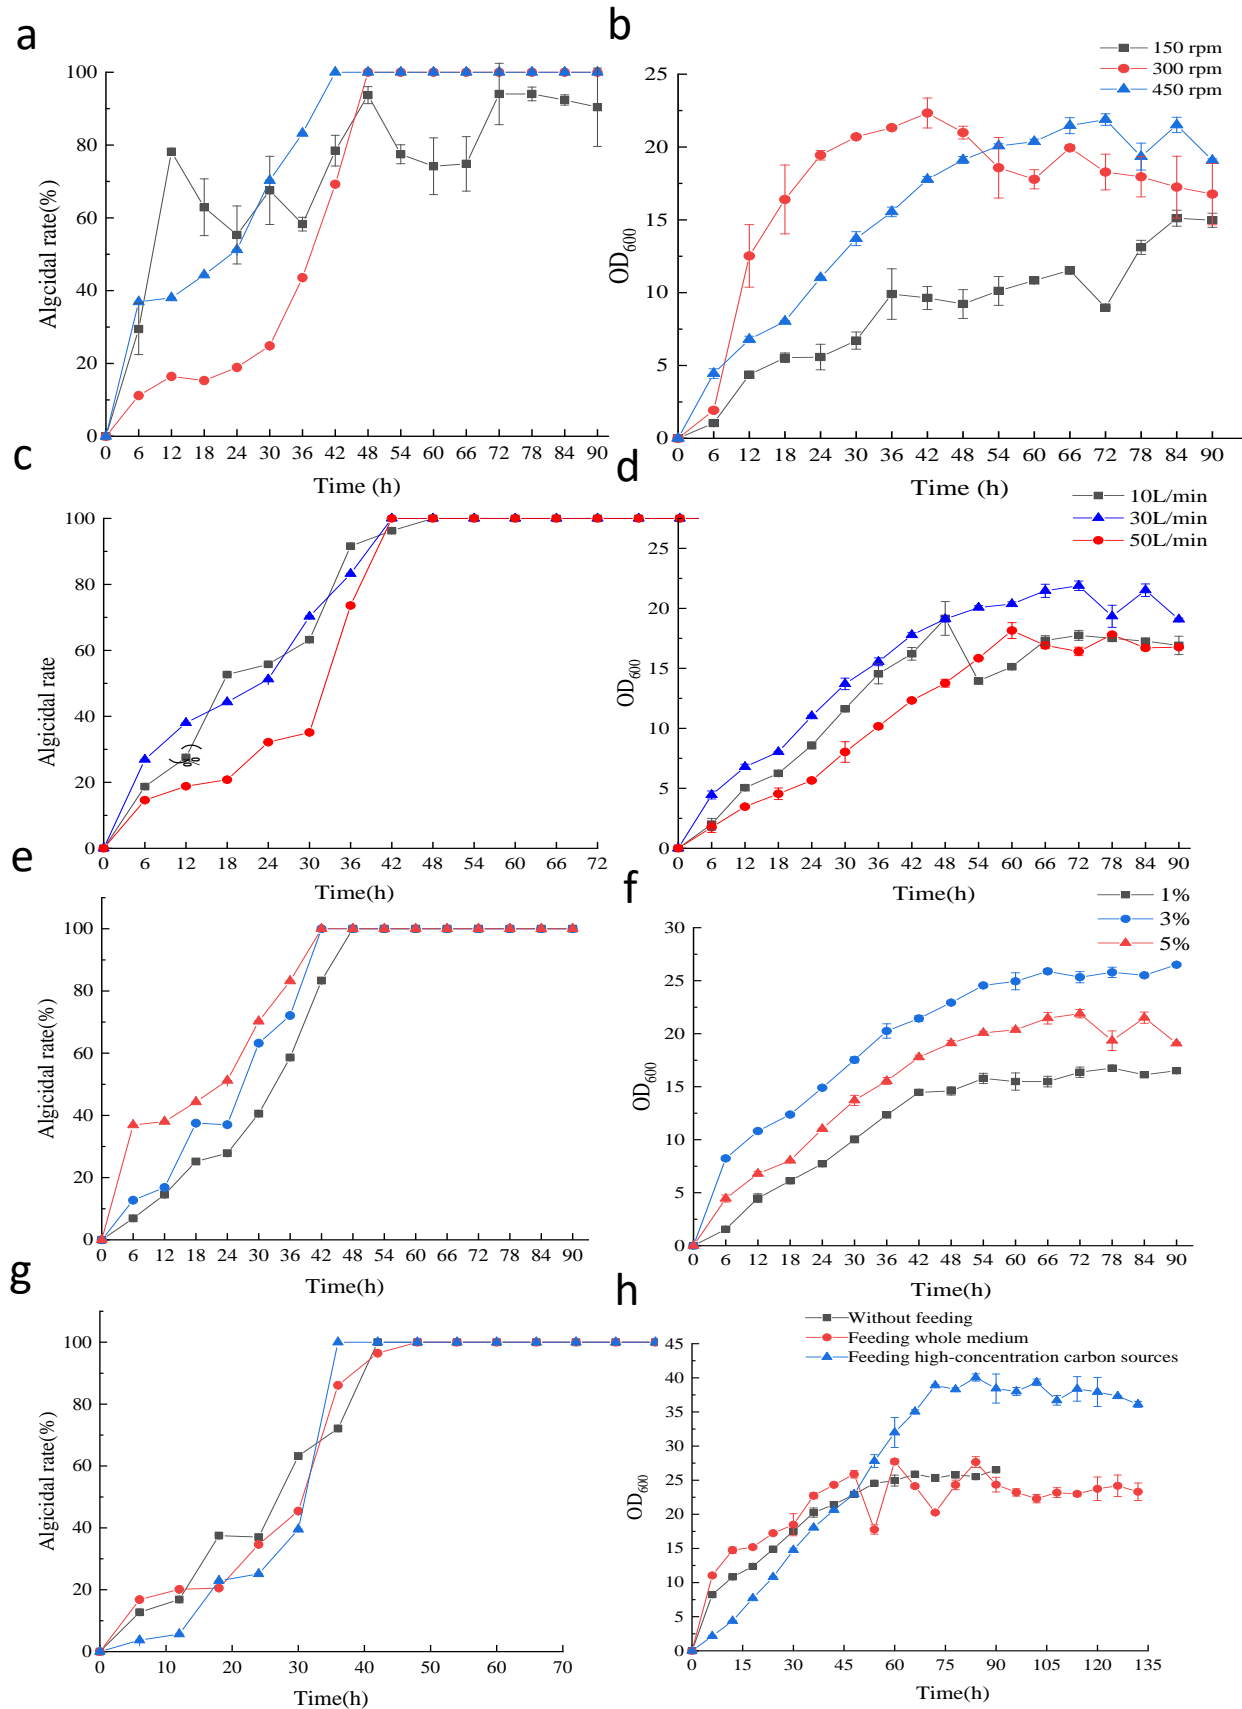

**Figure S8.** 50 L fermenter condition optimization. a-b, rotational speeds optimization using (a) algicidal rate and (b)  $OD_{600}$  value as indicators. c-d, ventilation volume optimization using (c) algicidal rate and (d)  $OD_{600}$  value as indicators. e-f, inoculum level optimization using (e) algicidal rate and (f)  $OD_{600}$  value as indicators. g-h, feeding strategy optimization using (g) algicidal rate and (h)  $OD_{600}$  value as indicators. Error bars depict standard deviations from triplicate culture.

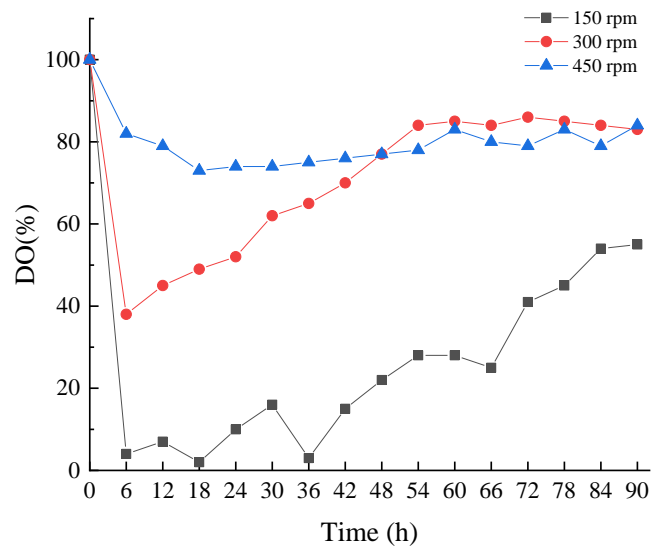

**Figure S9.** Changes in dissolved oxygen(DO) at different rotation speed in 50 L fermenter.
